# Supplementary material for: Structural variation, functional differentiation and expression characteristics of the AP2/ERF gene family and its response to cold stress and methyl jasmonate in Panax ginseng C.A. Meyer
Source: PubMed Central journal article supplement (PMC7075567; doi:10.1371/journal.pone.0226055), 2020-03-16
Supplement: pone.0226055.s001.pdf [file pone.0226055.s001.pdf]

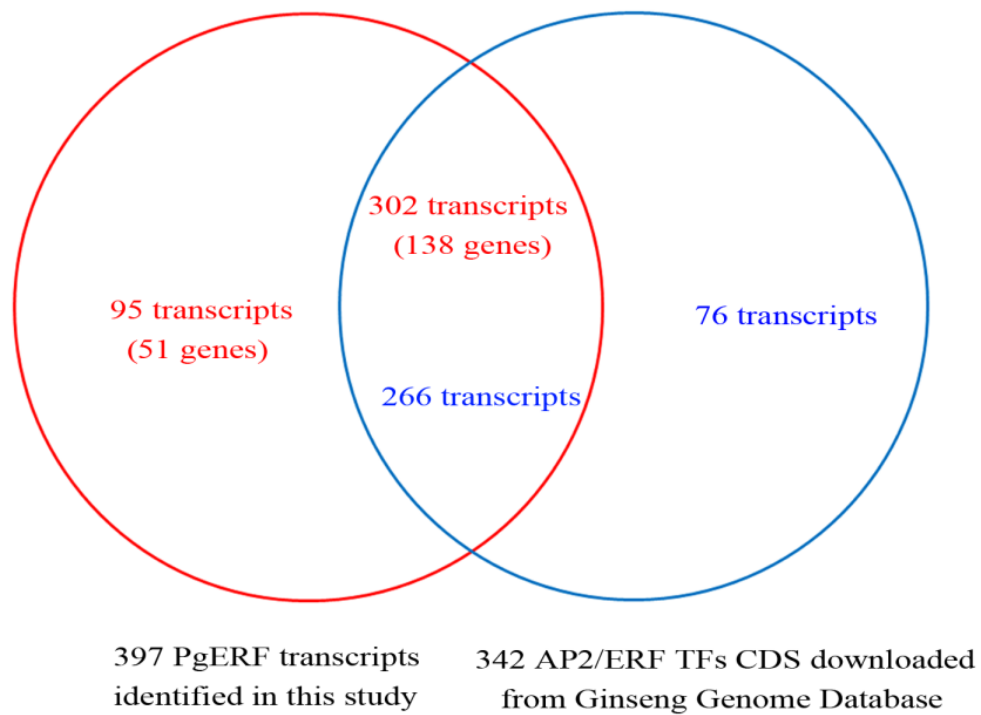

**S1 Fig. The Venn diagram of the sequence comparison between 397 *PgERF* transcripts identified in this study (left) and 342 *AP2/ERF* TFs CDS downloaded from Ginseng Genome Database (right).**
