# Supplementary material for: Structural variation, functional differentiation and expression characteristics of the AP2/ERF gene family and its response to cold stress and methyl jasmonate in Panax ginseng C.A. Meyer
Source: PubMed Central journal article supplement (PMC7075567; doi:10.1371/journal.pone.0226055), 2020-03-16
Supplement: pone.0226055.s004.pdf [file pone.0226055.s004.pdf]

|           |                        | 10                     | 20                     | 30                    | 40                    | 50                    | 60 | 70 |  |
|-----------|------------------------|------------------------|------------------------|-----------------------|-----------------------|-----------------------|----|----|--|
| I         | Pg                     | PgERF043               | LYRGVRCRHW..GKVVSEIRDF | ....KNR....TRLW       | GTFTDAEEAALAD         | QAAYRLRGDAAR....LNFP  |    | 58 |  |
|           |                        | PgERF115               | LFRGVRQRHW..GKVVSEIRDF | ....RNR....ARVW       | GTFTDAEEAALAD         | TAAAYLLRGGYAN....LNFP |    | 58 |  |
|           |                        | PgERF120               | LYRGVRCRHW..GKVVSEIRDF | ....QNR....MRVW       | GTYTEAEAAAYAD         | RAAYKLRGEYAR....LNFP  |    | 58 |  |
|           |                        | PgERF143               | LYRGVRCRHW..GKVVSEIRDF | ....KNR....TRLW       | GTFTDAEEAALAD         | KAAAYKLRGDFAR....LNFP |    | 58 |  |
|           |                        | PgERF144               | LYRGVRCRHW..GKVVSEIRDF | ....RNR....TRLW       | GTFTDAEEAALAD         | DREAYKLRGENAR....LNFP |    | 58 |  |
|           |                        | AT4G28140              | LYRGVRCRHW..GKVVSEIRDF | ....RSR....ARLW       | GTFTDAEEAALAD         | TRQAFKLRGSAT....LNFP  |    | 58 |  |
|           |                        | AT2G20880              | LYRGVRCRHW..GKVVSEIRDF | ....RNR....TRLW       | GTFTDAEEAALAD         | DREAFKLRGETAR....LNFP |    | 58 |  |
|           | At                     | AT1G36060              | LYRGVRCRHW..GKVVSEIRDF | ....RNR....TRLW       | GTFTDAEEAALAD         | DRAAFKLRGDSAR....LNFP |    | 58 |  |
|           |                        | AT2G22200              | LYRGVRCRHW..GKVVSEIRDF | ....KNR....TRLW       | GTFTAEKKAALAD         | QAAYKLRGDIAR....LNFP  |    | 58 |  |
|           |                        | AT5G65130              | LYRGVRCRHW..GKVVSEIRDF | ....KNR....TRLW       | GTFTAEQAALAD          | QAAMKLRGDNAR....LNFP  |    | 58 |  |
|           |                        | AT1G22190              | LYRGVRCRHW..GKVVSEIRDF | ....RNR....TRLW       | GTFTDAEEAALAD         | KAAAYKLRGDFAR....LNFP |    | 58 |  |
|           |                        | AT1G78080              | KYRGVRCRHW..GKVVSEIRDF | ....RNR....TRLW       | GTFTDAEEAALAD         | KAAAYKLRGDFAR....LNFP |    | 58 |  |
|           |                        | AT4G39780              | LYRGVRCRHW..GKVVSEIRDF | ....KNR....TRLW       | GTFTDAEEAALAD         | LAAAYKLRGEFAR....LNFP |    | 58 |  |
|           |                        | AT1G64380              | LYRGVRCRHW..GKVVSEIRDF | ....QNR....MRVW       | GTYTEAEAAAYAD         | RAAYKLRGEYAR....LNFP  |    | 58 |  |
| AT4G13620 | LYRGVRCRHW..GKVVSEIRDF | ....RNR....TRVW        | GTFTAEQAALAD           | TAAAYILRGEFAH....LNFP |                       | 58                    |    |    |  |
| II        | Pg                     | PgERF061               | KYKGVRRKRW..GKVVSEIRDF | ....NSR....DRIW       | GSYETPEEAARAD         | DAAVFCLRGPSAV....LNFP |    | 58 |  |
|           |                        | PgERF067               | RYKGVRRKRW..GKVVSEIRDF | ....HSR....DRIW       | GSYNTPEEAARAD         | DAAVFCLRGPTAV....LNFP |    | 58 |  |
|           |                        | PgERF073               | PYKGVRRKRW..GKVVSEIRDF | ....NKR....SRIW       | GSYSSPVAARAD          | TAVFYLRGPSAR....LNFP  |    | 58 |  |
|           |                        | PgERF082               | KYKGVRRKRW..GKVVSEIRDF | ....NSR....DRIW       | GSYDSPVKAARAD         | DAALFCLRGPTAK....LNFP |    | 58 |  |
|           |                        | PgERF107               | KFKGVRRKRW..GKVVSEIRDF | ....NQR....TRIW       | GSYSTAEAAARAD         | DALLCLKGPSAN....LNFP  |    | 58 |  |
|           |                        | PgERF110               | KYKGVRRKRW..GKVVSEIRDF | ....NSR....ERIW       | GSFDSAVKAARAD         | DAALYCLRGPTAK....LNFP |    | 58 |  |
|           |                        | PgERF126               | PYKGVRRKRW..GKVVSEIRDF | ....NKR....SRIW       | GSYSTAKAARAD          | TAVFYLRGPSAR....LNFP  |    | 58 |  |
|           | At                     | PgERF147               | PYKGVRRKRW..GKVVSEIRDF | ....KTK....KRIW       | GSHDSAEEKAARAD        | DASYYIHGAEGP....LNFP  |    | 57 |  |
|           |                        | AT1G46768              | PYKGVRRKRW..GKVVSEIRDF | ....NKR....SRIW       | GSYTTDIAAARAD         | DVAVFYLRGPSAR....LNFP |    | 58 |  |
|           |                        | AT4G06746              | KYKGVRRKRW..GKVVSEIRDF | ....NKR....SRIW       | GSYKTAVAAARAD         | TAVFYLRGPSAR....LNFP  |    | 58 |  |
|           |                        | AT2G23340              | PYKGVRRKRW..GKVVSEIRDF | ....NKR....SRIW       | GSYATPEAAARAD         | TAVFYLRGPSAR....LNFP  |    | 58 |  |
|           |                        | AT4G36900              | PYKGVRRKRW..GKVVSEIRDF | ....NKR....SRIW       | GSYSTPEAAARAD         | TAVFYLRGPSAR....LNFP  |    | 58 |  |
|           |                        | AT5G67190              | PYKGVRRKRW..GKVVSEIRDF | ....NKR....SRIW       | GSYSTPEAAARAD         | TAVFYLRGPATAR....LNFP |    | 58 |  |
|           |                        | AT3G50260              | PFKGVRRKRW..GKVVSEIRDF | ....NKR....SRIW       | GSYSTPEAAARAD         | TAVFYLRGPATAR....LNFP |    | 58 |  |
| III       | Pg                     | AT1G21910              | KYKGVRRKRW..GKVVSEIRDF | ....NQR....TRIW       | GSYSTAEAAARAD         | DALLCLKGPSAN....LNFP  |    | 58 |  |
|           |                        | AT1G77640              | KYKGVRRKRW..GKVVSEIRDF | ....NQR....TRIW       | GSYSTAEAAARAD         | DALLCLKGPKAN....LNFP  |    | 58 |  |
|           |                        | AT1G44830              | KYKGVRRKRW..GKVVSEIRDF | ....NQR....TRIW       | GSYSTAEAAARAD         | DALLCLKGSANN....LNFP  |    | 59 |  |
|           |                        | AT4G31060              | CYKGVRRKRW..GKVVSEIRDF | ....KTG....RRIW       | GSYDAEKAARAD          | DAALFCLRGKGV....LNFP  |    | 58 |  |
|           |                        | AT5G21960              | KYTGVRRKRW..GKVVSEIRDF | ....NSR....DRIW       | GSFDSAEEKAARAD        | DAALYCLRGPGAR....LNFP |    | 58 |  |
|           |                        | AT1G19210              | KYKGVRRKRW..GKVVSEIRDF | ....NSR....ERIW       | GSYDTPEKAARAD         | DAALYCLRGNNAR....LNFP |    | 58 |  |
|           |                        | AT1G74930              | KYKGVRRKRW..GKVVSEIRDF | ....HSR....ERIW       | GSYDTPEKAARAD         | DAALYCLRGNNAR....LNFP |    | 58 |  |
|           | At                     | AT1G22810              | KYKGVRRKRW..GKVVSEIRDF | ....GTR....DRIW       | GSFSTAEGAAARAD        | DVAFFCLHQP.SL..ESLNFP |    | 59 |  |
|           |                        | AT1G71520              | KYKGVRRKRW..GKVVSEIRDF | ....GTR....QRIW       | GSFSTAEGAAARAD        | DVAFFCLHQP.SL..ESLNFP |    | 62 |  |
|           |                        | PgERF016               | IYRGVRRKRW..GKVVSEIRDF | ....RKK....SRIW       | GTFTPEMAAARAD         | DVAALALKGRSAF....LNFP |    | 58 |  |
|           |                        | PgERF025               | IYRGVRRKRW..GKVVSEIRDF | ....RSP....NRIW       | GTFFTPEMAARAD         | DVAALALKGEAE....LNFP  |    | 60 |  |
|           |                        | PgERF075               | IYRGVRRKRW..GKVVSEIRDF | ....NKK....SRIW       | GTFFTPEMAARAD         | DVAALALKGEAS....LNFP  |    | 58 |  |
|           |                        | PgERF079               | VYRGVRRKRW..GKVVSEIRDF | ....NKK....SRIW       | GTFFTPEMAARAD         | DVAALALKGRSAC....LNFP |    | 58 |  |
|           |                        | PgERF093               | MYRGVRRKRW..GKVVSEIRDF | ....MKK....SRIW       | GTFFTPEMAARAD         | DVAALALKGRSAC....LNFP |    | 58 |  |
| IV        | Pg                     | PgERF113               | VYRGVRRKRW..GKVVSEIRDF | ....NKK....SRIW       | GTFFTPEMAARAD         | DVAALALKGRSAC....LNFP |    | 58 |  |
|           |                        | PgERF118               | VYRGVRRKRW..GKVVSEIRDF | ....RKT....TRIW       | GTFTPEMAAARAD         | DVAALALKGRSAC....LNFP |    | 57 |  |
|           |                        | PgERF121               | LYRGVRRKRW..GKVVSEIRDF | ....RKK....SRIW       | GTFTPEMAAARAD         | DVAALALKGRSAC....LNFP |    | 58 |  |
|           |                        | PgERF122               | LYRGVRRKRW..GKVVSEIRDF | ....KKK....TRIW       | GTFTPEMAAARAD         | DVAALALKGRSAC....LNFP |    | 58 |  |
|           |                        | PgERF149               | VYRGVRRKRW..GKVVSEIRDF | ....RKT....TRIW       | GTFTPEMAAARAD         | DVAALALKGRSAC....LNFP |    | 57 |  |
|           |                        | PgERF158               | VYRGVRRKRW..GKVVSEIRDF | ....RKK....SRIW       | GTFTPEMAAARAD         | DVAALALKGRSAC....LNFP |    | 58 |  |
|           |                        | AT1G71450              | AYRGVRRKRW..GKVVSEIRDF | ....GTK....NRIW       | GSFTPEMAAARAD         | DVAALALKGRSAC....LNFP |    | 58 |  |
|           | At                     | AT1G33760              | SYRGVRRKRW..GKVVSEIRDF | ....GKK....TRIW       | GSYETAEMAARAD         | DVAALALKGRSAC....LNFP |    | 58 |  |
|           |                        | AT1G01250              | VYRGVRRKRW..GKVVSEIRDF | ....RKK....SRIW       | GSFVPEMAAARAD         | DVAALALKGRSAC....LNFP |    | 58 |  |
|           |                        | AT2G36450              | LYRGVRRKRW..GKVVSEIRDF | ....RKP....NRIW       | GTFTPEMAAARAD         | DVAALALKGRSAC....LNFP |    | 59 |  |
|           |                        | AT5G52020              | IFRGVRRKRW..GKVVSEIRDF | ....RKT....TRIW       | GTFTPEMAAARAD         | DVAALALKGRSAC....LNFP |    | 57 |  |
|           |                        | AT1G63040              | VYRGVRRKRW..GKVVSEIRDF | ....KKT....TRVW       | GTFTPEMAAARAD         | DVAALALKGRSAC....LNFP |    | 57 |  |
|           |                        | AT1G12630              | VYRGVRRKRW..GKVVSEIRDF | ....RKT....TRIW       | GTFTPEMAAARAD         | DVAALALKGRSAC....LNFP |    | 57 |  |
|           |                        | AT5G51990              | IYRGVRRKRW..GKVVSEIRDF | ....NKK....SRIW       | GTFTPEMAAARAD         | DVAALALKGRSAC....LNFP |    | 58 |  |
| At        | AT4G25490              | IYRGVRRKRW..GKVVSEIRDF | ....NKK....SRIW        | GTFTPEMAAARAD         | DVAALALKGRSAC....LNFP |                       | 58 |    |  |
|           | AT4G25470              | IYRGVRRKRW..GKVVSEIRDF | ....NKK....SRIW        | GTFTPEMAAARAD         | DVAALALKGRSAC....LNFP |                       | 58 |    |  |
|           | AT4G25480              | IYRGVRRKRW..GKVVSEIRDF | ....NKK....SRIW        | GTFTPEMAAARAD         | DVAALALKGRSAC....LNFP |                       | 58 |    |  |
|           | AT1G63030              | IYRGVRRKRW..GKVVSEIRDF | ....IHQ....RRVW        | GTFTPEMAAARAD         | DVAALALKGRSAC....LNFP |                       | 58 |    |  |
|           | AT1G12610              | VYRGVRRKRW..GKVVSEIRDF | ....THQ....RRIW        | GTFTPEMAAARAD         | DVAALALKGRSAC....LNFP |                       | 58 |    |  |
|           | AT2G44940              | IYRGVRRKRW..GKVVSEIRDF | ....RKK....SRIW        | GTFTPEMAAARAD         | DVAALALKGRSAC....LNFP |                       | 58 |    |  |
|           | AT3G60490              | SYRGVRRKRW..GKVVSEIRDF | ....RKK....SRIW        | GTFTPEMAAARAD         | DVAALALKGRSAC....LNFP |                       | 58 |    |  |
|           | AT3G16280              | VYRGVRRKRW..GKVVSEIRDF | ....RKK....SRIW        | GTFTPEMAAARAD         | DVAALALKGRSAC....LNFP |                       | 58 |    |  |
|           | AT1G77200              | GYRGVRRKRW..GKVVSEIRDF | ....RKK....SRIW        | GTFTPEMAAARAD         | DVAALALKGRSAC....LNFP |                       | 58 |    |  |
|           | AT2G35700              | NFRGVRRKRW..GKVVSEIRDF | ....KKK....SRIW        | GTFTPEMAAARAD         | DVAALALKGRSAC....LNFP |                       | 58 |    |  |
|           | AT4G16750              | NFRGVRRKRW..GKVVSEIRDF | ....RKK....SRIW        | GTFTPEMAAARAD         | DVAALALKGRSAC....LNFP |                       | 58 |    |  |
|           | AT5G25810              | VYRGVRRKRW..GKVVSEIRDF | ....RKK....SRIW        | GTFTPEMAAARAD         | DVAALALKGRSAC....LNFP |                       | 58 |    |  |
|           | AT5G11590              | VYRGVRRKRW..GKVVSEIRDF | ....RKK....SRIW        | GTFTPEMAAARAD         | DVAALALKGRSAC....LNFP |                       | 58 |    |  |
|           | AT2G25820              | VYRGVRRKRW..GKVVSEIRDF | ....RKK....SRIW        | GTFTPEMAAARAD         | DVAALALKGRSAC....LNFP |                       | 58 |    |  |
| AT4G32800 | VYRGVRRKRW..GKVVSEIRDF | ....RKK....SRIW        | GTFTPEMAAARAD          | DVAALALKGRSAC....LNFP |                       | 58                    |    |    |  |
| IV        | Pg                     | PgERF128               | KYRGVRRKRW..GKVVSEIRDF | ....RGN....RIW        | GTFTPEMAAARAD         | DVAALALKGRSAC....LNFP |    | 58 |  |
|           |                        | PgERF154               | KYRGVRRKRW..GKVVSEIRDF | ....RHDGRRG....RFDW   | GTFTPEMAAARAD         | DVAALALKGRSAC....LNFP |    | 62 |  |
|           |                        | AT3G11020              | SFRGVRRKRW..GKVVSEIRDF | ....RIGT....RIW       | GTFTPEMAAARAD         | DVAALALKGRSAC....LNFP |    | 58 |  |
|           |                        | AT5G05410              | SFRGVRRKRW..GKVVSEIRDF | ....NRGS....RIW       | GTFTPEMAAARAD         | DVAALALKGRSAC....LNFP |    | 58 |  |
|           | At                     | AT2G38340              | RFRGVRRKRW..GKVVSEIRDF | ....SHRGANSSRSKRLW    | GTFTPEMAAARAD         | DVAALALKGRSAC....LNFP |    | 66 |  |
|           |                        | AT2G40350              | DYTGVRRTW..GKVVSEIRDF  | ....RGA....KLIW       | GTFTPEMAAARAD         | DVAALALKGRSAC....LNFP |    | 58 |  |
|           |                        | AT2G40340              | DYTGVRRTW..GKVVSEIRDF  | ....GGA....RIW        | GTFTPEMAAARAD         | DVAALALKGRSAC....LNFP |    | 58 |  |
|           |                        | AT1G75490              | TYKGVRRKRW..GKVVSEIRDF | ....RGA....RIW        | GTFTPEMAAARAD         | DVAALALKGRSAC....LNFP |    | 58 |  |
|           |                        | AT5G18450              | TFRGVRRKRW..GKVVSEIRDF | ....RGT....RIW        | GTFTPEMAAARAD         | DVAALALKGRSAC....LNFP |    | 58 |  |
|           |                        | AT3G57600              | QYRGVRRKRW..GKVVSEIRDF | ....KRR....ARLW       | GSFATAEAAALAD         | DAALYKLRGHDAY....LNFP |    | 58 |  |
|           |                        | AT2G40220              | RYRGVRRKRW..GKVVSEIRDF | ....RKR....TKKW       | GTFTPEMAAARAD         | DVAALALKGRSAC....LNFP |    | 58 |  |

YRG element

RAYD element

**S4 Fig. Comparison of the amino acid sequences of the protein AP2 domains of the DREB subfamily between ginseng and Arabidopsis.** The amino acids highlighted in black color represent the conserved amino acid residues, with 100% similarity. Their conserved YRG and RAYD elements are indicated by brackets.
