# Supplementary material for: Structural variation, functional differentiation and expression characteristics of the AP2/ERF gene family and its response to cold stress and methyl jasmonate in Panax ginseng C.A. Meyer
Source: PubMed Central journal article supplement (PMC7075567; doi:10.1371/journal.pone.0226055), 2020-03-16
Supplement: pone.0226055.s005.pdf [file pone.0226055.s005.pdf]

|           |                 | 10                  | 20              | 30             | 40           | 50             | 60           |    |
|-----------|-----------------|---------------------|-----------------|----------------|--------------|----------------|--------------|----|
| V         | Pg              | PgERF014            | RVLGRRRPPSRWVAE | IKD.T....IQKTR | VWLGTFDTAE   | ARAYDEAAACLLR  | FN.TRTMFC    | 58 |
|           |                 | PgERF040            | KFVGRRRPPSRWVAE | IKN.T....SQKTR | VWLGTFDTAE   | ARAYDEAAACLLR  | GN.TRTMFW    | 58 |
|           |                 | PgERF049            | KFRGRRRPPSRWVSE | IRH.P....LLKTR | VWLGTFETAED  | ARAYDEAAVLMSSR | GN.AKTNFP    | 58 |
|           |                 | PgERF060            | RYRGRRRPPSRWVSE | IRH.P....LLKTR | VWLGTFETAED  | ARAYDEAARLMGSR | GR.ARTNFD    | 58 |
|           |                 | PgERF085            | RYRGRRRPPSRWVSE | IRH.P....LLKTR | VWLGTFETAED  | ARAYDEAARLMGSR | GR.AKTNFP    | 58 |
|           | At              | AT1G15360           | RFLGRRRPPSRWVAE | IKD.T....IQKTR | VWLGTFDTAE   | ARAYDEAAACLLR  | GN.TRTMFW    | 58 |
|           |                 | AT5G19790           | KFVGRRRPPSRWVAE | IKD.T....TQKTR | VWLGTFETAED  | ARAYDEAAACLLR  | GN.TRTMFA    | 58 |
|           |                 | AT5G25190           | RFRGRRRPPSRWVSE | IRH.P....LLKTR | VWLGTFETAED  | ARAYDEAARLMGSR | GR.AKTNFP    | 58 |
|           |                 | AT5G11190           | KFRGRRRPPSRWVSE | IRH.P....LLKTR | VWLGTFETAED  | ARAYDQAALLMNGR | GN.AKTNFP    | 58 |
|           |                 | AT5G25390           | KFRGRRRPPSRWVSE | IRH.P....LLKTR | VWLGTFDTAET  | ARAYDQAALLMNGR | GN.AKTNFP    | 58 |
| VI        | Pg              | PgERF127            | KFRGRRRPPSRWVAE | IKD.P....LRHV  | VWLGTYDTAE   | AMVYDHAAIKIR   | EPD.ALTNFP   | 58 |
|           |                 | PgERF130            | KFRGRRRPPSRWVAE | IKD.P....TRRV  | VWLGTYDTAE   | AMVYDHAAIKIR   | EPD.ALTNFP   | 58 |
|           |                 | PgERF153            | KYRGRRRPPSRWVAE | IKD.P....SRRR  | VWLGTYDTAE   | ALVYDAAAIQIR   | EPD.ALTNFL   | 58 |
|           |                 | AT4G11140           | KFRGRRRPPSRWVAE | IKD.P....SRRV  | VWLGTFDTAE   | ALVYDAAAIQIR   | EPN.AELNFP   | 58 |
|           |                 | AT4G23750           | KFRGRRRPPSRWVAE | IKD.P....LKRVR | VWLGTYNTAE   | AMVYDAAAIQIR   | EPD.ALTNFS   | 58 |
|           | At              | AT5G53290           | KFRGRRRPPSRWVAE | IKD.P....EQRFR | VWLGTFETAED  | ALVYDAAAIQIR   | EPD.ALTNFS   | 58 |
|           |                 | AT4G27950           | KYRGRRRPPSRWVAE | IKD.P....EQRFR | VWLGTFETAED  | ALVYDAAAIQIR   | EPD.ALTNFT   | 58 |
|           |                 | AT3G61630           | KYRGRRRPPSRWVAE | IKD.P....SSRT  | VWLGTFVTAED  | ALVYDRAAIHLR   | EPK.ALTNFL   | 58 |
|           |                 | AT2G46310           | KYRGRRRPPSRWVAE | IKD.P....SSRT  | VWLGTFETAED  | ALVYDRAAIHLR   | EPK.ALTNFL   | 58 |
|           |                 | AT1G22985           | KFRGRRRPPSRWVAE | IKD.P....VKGRR | VWLGTFETAED  | ALVYDAAAIQIR   | EPD.AFTNFG   | 61 |
| AT1G71130 | KYRGRRRPPSRWVAE | IKD.P....RCGRGACKGR | RLVWLGTFNTAE    | ALVYDAAAIQIR   | EPK.AFTNFG   | 63             |              |    |
| VII       | Pg              | PgERF087            | KYRGRRRPPSRWVAE | IKD.P....QKGV  | VWLGTFNTAE   | ARAYDAAARRIR   | EPK.KLNFP    | 58 |
|           |                 | PgERF138            | QYRGRRRPPSRWVAE | IKD.P....RKGVR | VWLGTFNTAE   | ARAYDSEARRIR   | EPK.KVNFP    | 58 |
|           |                 | PgERF156            | QFRGRRRPPSRWVAE | IKD.P....RKGVR | VWLGTYNSAE   | ARAYDSEARRIR   | EPK.KVNFP    | 58 |
|           |                 | AT2G47520           | LYRGRRRPPSRWVAE | IKD.P....SKGV  | VWLGTFKTAED  | AMVYDVAARIKIR  | EPK.KAPKLNFP | 59 |
|           |                 | AT3G16770           | VYRGRRRPPSRWVAE | IKD.P....RKGVR | VWLGTFNTAE   | AMVYDVAARIKIR  | EPK.KAPKLNFP | 59 |
|           | At              | AT1G72360           | RYRGRRRPPSRWVAE | IKD.P....IKGV  | VWLGTFNTAE   | ARAYDLEARRIR   | EPK.KAPKLNFP | 59 |
|           |                 | AT1G53910           | KYRGRRRPPSRWVAE | IKD.P....REGAR | VWLGTFKTAED  | ARAYDAAARRIR   | EPK.KVNFP    | 58 |
|           |                 | AT3G14230           | QYRGRRRPPSRWVAE | IKD.P....RKGSR | VWLGTFDTAE   | ARAYDAAARRIR   | EPK.KVNFP    | 58 |
|           |                 | PgERF081            | HFRGRRRPPSRWVAE | IKD.P....WKTR  | VWLGTFETAED  | ARAYDAAARRIR   | EPK.AKTNFP   | 58 |
|           |                 | PgERF105            | HFRGRRRPPSRWVAE | IKD.P....SKKSR | VWLGTFDTAE   | ARAYDAAARRIR   | EPK.AKTNFP   | 58 |
| VIII      | Pg              | PgERF106            | RYRGRRRPPSRWVAE | IKD.P....WKTR  | VWLGTFDSAED  | ARAYDAAARRIR   | EPK.AKTNFP   | 58 |
|           |                 | PgERF117            | RYRGRRRPPSRWVAE | IKD.P....GKKSR | VWLGTFDTAE   | ARAYDAAARRIR   | EPK.AKTNFP   | 58 |
|           |                 | PgERF119            | HFRGRRRPPSRWVAE | IKD.P....GKKSR | VWLGTFDTAE   | ARAYDAAARRIR   | EPK.AKTNFP   | 58 |
|           |                 | PgERF123            | RFRGRRRPPSRWVAE | IKD.P....WKTR  | VWLGTFDSAED  | ARAYDAAARRIR   | EPK.AKTNFP   | 58 |
|           |                 | PgERF152            | HFRGRRRPPSRWVAE | IKD.P....SKKSR | VWLGTFDTAE   | ARAYDAAARRIR   | EPK.AKTNFP   | 58 |
|           | At              | AT2G47520           | LYRGRRRPPSRWVAE | IKD.P....SKGV  | VWLGTFKTAED  | AMVYDVAARIKIR  | EPK.KAPKLNFP | 59 |
|           |                 | AT3G16770           | VYRGRRRPPSRWVAE | IKD.P....RKGVR | VWLGTFNTAE   | AMVYDVAARIKIR  | EPK.KAPKLNFP | 59 |
|           |                 | AT1G72360           | RYRGRRRPPSRWVAE | IKD.P....IKGV  | VWLGTFNTAE   | ARAYDLEARRIR   | EPK.KAPKLNFP | 59 |
|           |                 | AT1G53910           | KYRGRRRPPSRWVAE | IKD.P....REGAR | VWLGTFKTAED  | ARAYDAAARRIR   | EPK.KVNFP    | 58 |
|           |                 | AT3G14230           | QYRGRRRPPSRWVAE | IKD.P....RKGSR | VWLGTFDTAE   | ARAYDAAARRIR   | EPK.KVNFP    | 58 |
| IX        | Pg              | PgERF036            | KYRGRRRPPSRWVAE | IKD.P....RQGV  | VWLGTFNTAE   | ARAYDRAAYMR    | EPK.AVLNFP   | 59 |
|           |                 | PgERF038            | RHRGRRRPPSRWVAE | IKD.P....RNGGR | VWLGTFETAED  | ARAYDRAAYMR    | EPK.AVLNFP   | 59 |
|           |                 | PgERF046            | RYRGRRRPPSRWVAE | IKD.P....KKGGR | VWLGTYDTPED  | ALVYDRAAAYMR   | EPK.AKVNFP   | 59 |
|           |                 | PgERF047            | RYRGRRRPPSRWVAE | IKD.P....KKGGR | VWLGTYDTPED  | ALVYDRAAAYMR   | EPK.AKVNFP   | 59 |
|           |                 | PgERF050            | AYRGRRRPPSRWVAE | IKD.P....RNGVR | VWLGTFDTAE   | ALVYDQAAYMR    | EPK.AVLNFP   | 59 |
|           | At              | PgERF051            | SYRGRRRPPSRWVAE | IKD.P....RNGVR | VWLGTFDSAED  | ALVYDQAAYMR    | EPK.AVLNFP   | 59 |
|           |                 | PgERF057            | HYRGRRRPPSRWVAE | IKD.P....KNGAR | VWLGTYENAE   | ALVYDRAAAYMR   | EPK.AVLNFP   | 59 |
|           |                 | PgERF058            | RYRGRRRPPSRWVAE | IKD.P....RNGIR | VWLGTFDSAED  | ALVYDQAAYMR    | EPK.AVLNFP   | 59 |
|           |                 | PgERF066            | QYRGRRRPPSRWVAE | IKD.P....KKGGR | VWLGTYDTPED  | ALVYDRAAAYMR   | EPK.AVLNFP   | 59 |
|           |                 | PgERF074            | RYRGRRRPPSRWVAE | IKD.P....KKGGR | VWLGTYDTPED  | ALVYDRAAAYMR   | EPK.AVLNFP   | 59 |
| X         | Pg              | PgERF080            | RYRGRRRPPSRWVAE | IKD.P....KKGGR | VWLGTYETPED  | ALVYDRAAAYMR   | EPK.AVLNFP   | 59 |
|           |                 | PgERF083            | KYRGRRRPPSRWVAE | IKD.P....RNGAR | VWLGTFSTGEE  | ARAYDRAAAYMR   | EPK.AVLNFP   | 59 |
|           |                 | PgERF086            | RYRGRRRPPSRWVAE | IKD.P....RHGAR | VWLGTFETAED  | ALVYDRAAAYMR   | EPK.AVLNFP   | 59 |
|           |                 | PgERF091            | RYRGRRRPPSRWVAE | IKD.P....KKGGR | VWLGTYETPED  | ALVYDRAAAYMR   | EPK.AVLNFP   | 59 |
|           |                 | PgERF094            | HYRGRRRPPSRWVAE | IKD.P....RKGR  | VWLGTFDIAVD  | ARAYDRAAAYMR   | EPK.AVLNFP   | 59 |
|           | At              | PgERF095            | HYRGRRRPPSRWVAE | IKD.P....KNGAR | VWLGTFETAED  | ALVYDRAAAYMR   | EPK.AVLNFP   | 59 |
|           |                 | PgERF096            | AYRGRRRPPSRWVAE | IKD.P....RNGIR | VWLGTFDSAED  | ALVYDQAAYMR    | EPK.AVLNFP   | 59 |
|           |                 | PgERF097            | HYRGRRRPPSRWVAE | IKD.P....RKGSR | VWLGTFDTAE   | ALVYDRAAAYMR   | EPK.AVLNFP   | 59 |
|           |                 | PgERF098            | AYRGRRRPPSRWVAE | IKD.P....RNGIR | VWLGTFDSAED  | ALVYDQAAYMR    | EPK.AVLNFP   | 59 |
|           |                 | PgERF099            | RYRGRRRPPSRWVAE | IKD.P....RNGIR | VWLGTFDSAED  | ALVYDQAAYMR    | EPK.AVLNFP   | 59 |
| At        | PgERF102        | HYRGRRRPPSRWVAE     | IKD.P....KNGAR  | VWLGTFETAED    | ALVYDRAAAYMR | EPK.AVLNFP     | 59           |    |
|           | PgERF111        | HYRGRRRPPSRWVAE     | IKD.P....RRGSR  | VWLGTYETPED    | ALVYDRAAAYMR | EPK.AVLNFP     | 59           |    |
|           | PgERF141        | RFRGRRRPPSRWVAE     | IKD.P....KKGGR  | VWLGTYETPED    | ALVYDRAAAYMR | EPK.AVLNFP     | 59           |    |
|           | PgERF146        | HYRGRRRPPSRWVAE     | IKD.P....KNGAR  | VWLGTYETPED    | ALVYDRAAAYMR | EPK.AVLNFP     | 59           |    |
|           | PgERF150        | RYRGRRRPPSRWVAE     | IKD.P....KKGGR  | VWLGTYDTPED    | ALVYDRAAAYMR | EPK.AVLNFP     | 59           |    |
| X         | Pg              | PgERF157            | RYRGRRRPPSRWVAE | IKD.P....RQGAR | VWLGTFETAED  | ARAYDRAAAYMR   | EPK.AVLNFP   | 59 |
|           |                 | AT4G18450           | KYRGRRRPPSRWVAE | IKD.P....RNGVR | VWLGTFQTAED  | ALVYDRAAAYMR   | EPK.AVLNFP   | 60 |
|           |                 | AT3G23240           | SYRGRRRPPSRWVAE | IKD.P....RNGIR | VWLGTFESAED  | ALVYDQAAYMR    | EPK.AVLNFP   | 59 |
|           |                 | AT2G31230           | SYRGRRRPPSRWVAE | IKD.P....RNGIR | VWLGTFDKAED  | ALVYDQAAYMR    | EPK.AVLNFP   | 59 |
|           |                 | AT1G06160           | SYRGRRRPPSRWVAE | IKD.P....RKGR  | VWLGTFDTAE   | ALVYDQAAYMR    | EPK.AVLNFP   | 59 |
|           | At              | AT3G23220           | KYRGRRRPPSRWVAE | IKD.P....RHGAR | VWLGTFNTAE   | ARAYDRAAAYMR   | EPK.AVLNFP   | 59 |
|           |                 | AT5G43410           | KYRGRRRPPSRWVAE | IKD.P....KHGR  | VWLGTFDTAE   | ARAYDRAAAYMR   | EPK.AVLNFP   | 59 |
|           |                 | AT1G04370           | KYRGRRRPPSRWVAE | IKD.P....KHGR  | VWLGTFDTAE   | ARAYDRAAAYMR   | EPK.AVLNFP   | 59 |
|           |                 | AT3G23230           | RFRGRRRPPSRWVAE | IKD.P....RNGAR | VWLGTFETAED  | ARAYDRAAAYMR   | EPK.AVLNFP   | 59 |
|           |                 | AT2G44840           | QYRGRRRPPSRWVAE | IKD.P....KNGAR | VWLGTYETPED  | ALVYDRAAAYMR   | EPK.AVLNFP   | 59 |
| At        | AT4G17500       | HYRGRRRPPSRWVAE     | IKD.P....KNGAR  | VWLGTFETAED    | ALVYDRAAAYMR | EPK.AVLNFP     | 59           |    |
|           | AT5G47220       | HYRGRRRPPSRWVAE     | IKD.P....KNGAR  | VWLGTFETAED    | ALVYDRAAAYMR | EPK.AVLNFP     | 59           |    |
|           | AT5G47230       | HYRGRRRPPSRWVAE     | IKD.P....KNGAR  | VWLGTFETAED    | ALVYDRAAAYMR | EPK.AVLNFP     | 59           |    |
|           | AT4G17490       | HYRGRRRPPSRWVAE     | IKD.P....RRGR   | VWLGTFETAED    | ARAYDRAAAYMR | EPK.AVLNFP     | 59           |    |
|           | AT5G61600       | HYRGRRRPPSRWVAE     | IKD.P....KKGGR  | VWLGTYDTPED    | ALVYDRAAAYMR | EPK.AVLNFP     | 59           |    |
| At        | AT5G07580       | HYRGRRRPPSRWVAE     | IKD.P....KKGGR  | VWLGTFESVD     | ARAYDCAAFMR  | EPK.AVLNFP     | 59           |    |
|           | AT5G61590       | HYRGRRRPPSRWVAE     | IKD.P....KKGSR  | VWLGTFESDID    | ARAYDCAAFMR  | EPK.AVLNFP     | 59           |    |
|           | PgERF033        | NYRGRRRPPSRWVAE     | IKD.P....RKAAR  | VWLGTFETAED    | ARAYDRAAAYMR | EPK.KLNFP      | 58           |    |
|           | PgERF054        | NYRGRRRPPSRWVAE     | IKD.P....RNAAR  | VWLGTFETAED    | ARAYDRAAAYMR | EPK.KLNFP      | 58           |    |
|           | PgERF136        | HYRGRRRPPSRWVAE     | IKD.P....VKAA   | VWLGTFDTAE     | ALVYDRAAAYMR | EPK.KLNFP      | 58           |    |
| At        | AT1G43160       | KYRGRRRPPSRWVAE     | IKD.P....HKAT   | VWLGTFETAED    | ARAYDRAAAYMR | EPK.KLNFP      | 58           |    |
|           | AT4G34410       | GYRGRRRPPSRWVAE     | IKD.P....KRAAT  | VWLGTFETAED    | ARAYDRAAAYMR | EPK.KLNFP      | 58           |    |
|           | AT5G00800       | RYRGRRRPPSRWVAE     | IKD.P....HRAAT  | VWLGTFDTAE     | ARAYDRAAAYMR | EPK.KLNFP      | 58           |    |
|           | AT5G64750       | RYRGRRRPPSRWVAE     | IKD.P....FKAA   | VWLGTFDTAE     | ARAYDRAAAYMR | EPK.KLNFP      | 58           |    |
|           | AT2G33710       | NYRGRRRPPSRWVAE     | IKD.P....NKAA   | VWLGTFDTAE     | ARAYDRAAAYMR | EPK.KLNFP      | 58           |    |
| At        | AT5G13330       | HYRGRRRPPSRWVAE     | IKD.P....KKAAR  | VWLGTFETAED    | ALVYDRAAAYMR | EPK.KLNFP      | 58           |    |
|           | AT5G61890       | HYRGRRRPPSRWVAE     | IKD.P....KKAAR  | VWLGTFETAED    | ALVYDRAAAYMR | EPK.KLNFP      | 58           |    |
|           | AT5G07310       | HYRGRRRPPSRWVAE     | IKD.P....QRAAR  | VWLGTFETAED    | ALVYDRAAAYMR | EPK.KLNFP      | 58           |    |

YRG element

RAYD element

**S5 Fig. Comparison of the amino acid sequences of the AP2 domains of the ERF subfamily proteins from ginseng and Arabidopsis.** The black background represents the conserved amino acid residues, with 100% similarity. The conserved YRG and RAYD elements are indicated by brackets.
